# Supplementary material for: Inhibition of SARS-CoV-2 Alpha Variant and Murine Noroviruses on Copper-Silver Nanocomposite Surfaces
Source: MDPI journal article supplement (doi:10.3390/nano12071037), 2022-03-22
Supplement: s1 [file s1]

# Inhibition of SARS-CoV-2 Alpha Variant and Murine Noroviruses on Copper-Silver Nanocomposite Surfaces

Dina A. Mosselhy <sup>1,2,\*</sup>, Lauri Kareinen <sup>1,2</sup>, Ilkka Kivistö <sup>1,2</sup>, Jenni Virtanen <sup>1,2</sup>, Emil Loikkanen <sup>3</sup>, Yanling Ge <sup>4</sup>, Leena Maunula <sup>3</sup> and Tarja Sironen <sup>1,2,\*</sup>

<sup>1</sup> Department of Virology, Faculty of Medicine, University of Helsinki, 00014 Helsinki, Finland; lauri.kareinen@helsinki.fi (L.K.); ilkka.kivisto@helsinki.fi (I.K.); jenni.me.virtanen@helsinki.fi (J.V.)

<sup>2</sup> Department of Veterinary Biosciences, Faculty of Veterinary Medicine, University of Helsinki, 00014 Helsinki, Finland

<sup>3</sup> Department of Food Hygiene and Environmental Health, Faculty of Veterinary Medicine, University of Helsinki, 00014 Helsinki, Finland; emil.loikkanen@helsinki.fi (E.L.); leena.maunula@helsinki.fi (L.M.)

<sup>4</sup> VTT Technical Research Center of Finland Ltd., 02044 Espoo, Finland; yanling.ge@vtt.fi

\* Correspondence: dina.mosselhy@helsinki.fi (D.A.M.); tarja.sironen@helsinki.fi (T.S.)

**Table S1.** EDX quantitative chemical composition of sample A in a concentration descending manner.

| Element | Weight (wt)% | Atomic % | Error % |
|---------|--------------|----------|---------|
| Cu K    | 56           | 38.6     | 1.6     |
| Ag L    | 27.8         | 11.3     | 1.1     |
| C K     | 9.3          | 34       | 15.1    |
| O K     | 4.5          | 12.4     | 15.1    |
| Al K    | 1.2          | 2        | 1.8     |
| Sn L    | 1.2          | 0.4      | 4.6     |
| Si K    | 1            | 1.6      | 1.9     |

**Table S2.** EDX quantitative chemical composition of sample B in a concentration descending manner.

| Element | Weight (wt)% | Atomic % | Error % |
|---------|--------------|----------|---------|
| Cu K    | 59.1         | 30       | 3       |
| C K     | 20.9         | 56.2     | 8.5     |
| Ag L    | 12.7         | 3.8      | 1.6     |
| O K     | 3.9          | 7.8      | 8.6     |
| Sn L    | 2            | 0.6      | 2.7     |
| Al K    | 0.8          | 0.9      | 7.9     |
| Si K    | 0.7          | 0.8      | 6.9     |

**Table S3.** EDX quantitative chemical composition of sample C in a concentration descending manner.

| Element | Weight (wt)% | Atomic % | Error % |
|---------|--------------|----------|---------|
| Cu K    | 48.2         | 19.8     | 3       |
| C K     | 30.9         | 67.1     | 8.2     |
| Ag L    | 11.4         | 2.8      | 1.9     |
| O K     | 4.7          | 7.7      | 9       |
| Sn L    | 2.6          | 0.6      | 3.3     |
| Al K    | 1.1          | 1        | 6.9     |
| Si K    | 1            | 1        | 5.9     |

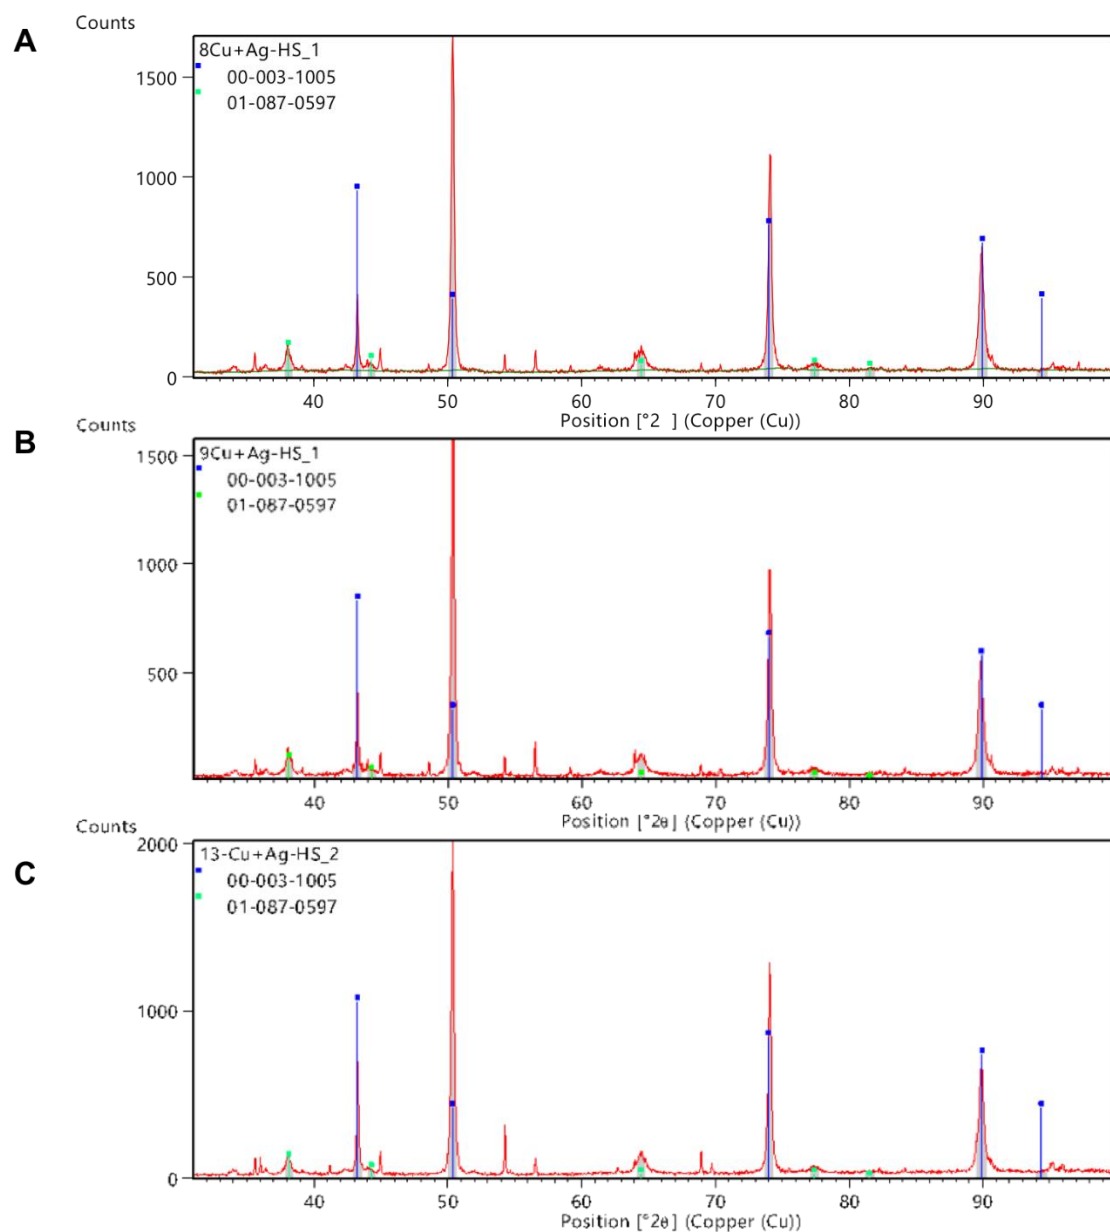

**Figure S1.** XRD patterns of Cu-Ag nanocomposite surfaces using Cu K $\alpha$  radiation over a 30° to 100° 2 $\theta$  range with blue and green lines indicating Cu and Ag diffraction peaks with ICDD reference patterns for Cu and Ag, respectively.

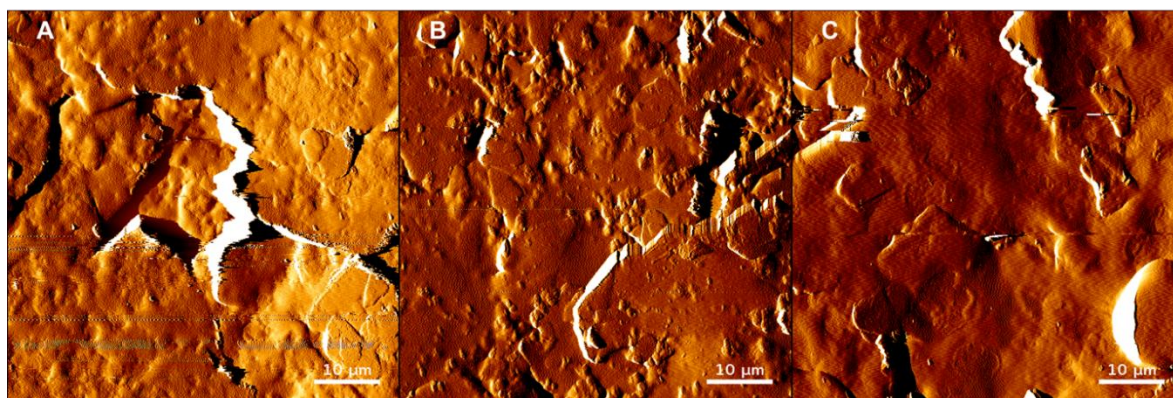

**Figure S2.** AFM amplitude error images showing the rough surfaces of samples A, B, and C.

**Table S4.** Culture results expressed as the presence of cytopathic effects (CPE) on cells and Ct values of the RT-PCR performed on post-culture media.

| -               | 1 min |           | 5 min |           | 10 min |           |
|-----------------|-------|-----------|-------|-----------|--------|-----------|
| -               | CPE   | Ct values | CPE   | Ct values | CPE    | Ct values |
| <b>Sample A</b> | +     | No Ct     | -     | No Ct     | -      | 34.52     |
| <b>Sample B</b> | -     | No Ct     | +     | 34.82     | +      | No Ct     |
| <b>Glass</b>    | +++   | 16.87     | +++   | 12.01     | +++    | 14.50     |

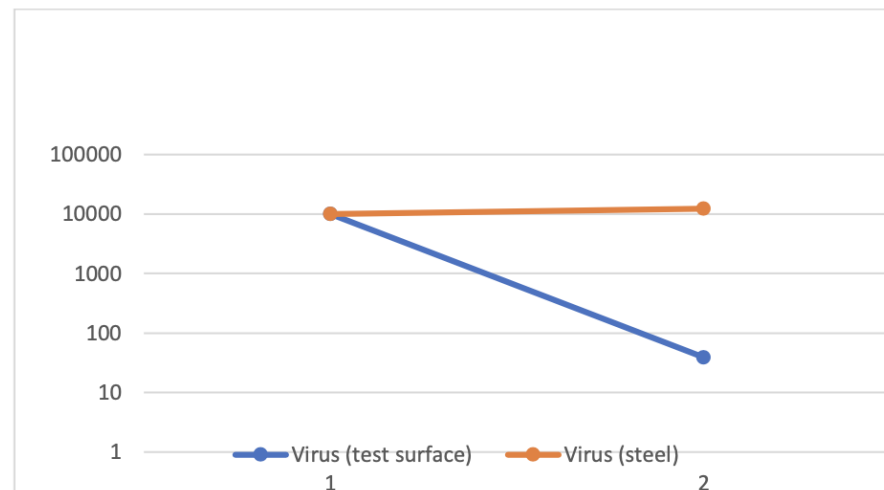

**Figure S3.** A logarithmic scale (10 000 equates  $\log_4 \text{TCID}_{50}$ ) showing no reduction in infectious murine norovirus (MNV) amount on stainless steel (as a negative control) after 30 min in comparison with the observed tremendous viral reduction on the tested surface (sample C) in a preliminary investigation.
